# Supplementary material for: Association Between Dietary Intake of One-Carbon Metabolism-Related Nutrients and Fluorosis in Guizhou, China
Source: PubMed Central journal article supplement (PMC8505735; doi:10.3389/fnut.2021.700726), 2021-09-28
Supplement: Data_Sheet_1.pdf [file Data_Sheet_1.pdf]

Table S1. Association between Quartiles of Dietary Energy-adjusted Folate and Fluorosis According to Sex, Alcohol Drinking Status, Smoking Status and Urinary Fluoride Levels

| Folate (ug/day)          | Quartile of intake |                  |                  |                   | <i>P</i> -trend | <i>P</i> -interaction |
|--------------------------|--------------------|------------------|------------------|-------------------|-----------------|-----------------------|
|                          | Q1                 | Q2               | Q3               | Q4                |                 |                       |
| <b>Sex</b>               |                    |                  |                  |                   |                 |                       |
| <b>Men</b>               |                    |                  |                  |                   |                 |                       |
| No. cases/controls       | 67/12              | 79/14            | 83/36            | 82/39             |                 |                       |
| OR (95% CI) <sup>‡</sup> | 1                  | 1.09 (0.45,2.67) | 0.36 (0.16,0.80) | 0.37 (0.17,0.83)  | 0.001           |                       |
| <b>Women</b>             |                    |                  |                  |                   |                 |                       |
| No. cases/controls       | 112/32             | 98/33            | 70/35            | 62/40             |                 |                       |
| OR (95% CI) <sup>‡</sup> | 1                  | 0.84 (0.46,1.54) | 0.52 (0.28,0.98) | 0.41(0.21, 0.79)  | 0.003           | 0.960                 |
| <b>Alcohol</b>           |                    |                  |                  |                   |                 |                       |
| <b>Drinker</b>           |                    |                  |                  |                   |                 |                       |
| No. cases/controls       | 40/12              | 64/11            | 46/24            | 52/26             |                 |                       |
| OR (95% CI) <sup>‡</sup> | 1                  | 1.94 (0.70,5.46) | 0.51 (0.20,1.35) | 0.65 (0.26,1.63)  | 0.063           |                       |
| <b>Non-drinker</b>       |                    |                  |                  |                   |                 |                       |
| No. cases/controls       | 139/32             | 113/36           | 107/47           | 92/53             |                 |                       |
| OR (95% CI) <sup>‡</sup> | 1                  | 0.67(0.38,1.18)  | 0.43 (0.24,0.76) | 0.30 (0.17, 0.56) | < 0.001         | 0.591                 |
| <b>Smoking status</b>    |                    |                  |                  |                   |                 |                       |
| <b>Smoker</b>            |                    |                  |                  |                   |                 |                       |
| No. cases/controls       | 64/15              | 70/12            | 72/28            | 71/30             |                 |                       |
| OR (95% CI) <sup>‡</sup> | 1                  | 1.50 (0.61,3.69) | 0.55 (0.25,1.22) | 0.55 (0.25,1.21)  | 0.032           |                       |
| <b>Non-smoker</b>        |                    |                  |                  |                   |                 |                       |

|                            |        |                  |                  |                   |         |       |
|----------------------------|--------|------------------|------------------|-------------------|---------|-------|
| No. cases/controls         | 115/29 | 107/35           | 81/43            | 73/49             |         |       |
| OR (95% CI) <sup>‡</sup>   | 1      | 0.73(0.40,1.33)  | 0.41 (0.22,0.77) | 0.33 (0.17, 0.62) | < 0.001 | 0.290 |
| Urinary level <sup>†</sup> |        |                  |                  |                   |         |       |
| ≤1.6 mg/L                  |        |                  |                  |                   |         |       |
| No. cases/controls         | 84/25  | 88/20            | 74/36            | 78/50             |         |       |
| OR (95% CI) <sup>‡</sup>   | 1      | 1.19 (0.57,2.46) | 0.51 (0.26,1.01) | 0.31 (0.16,0.61)  | < 0.001 |       |
| >1.6mg/L                   |        |                  |                  |                   |         |       |
| No. cases/controls         | 56/10  | 58/11            | 56/14            | 46/12             |         |       |
|                            | 1      | 0.94 (0.34,2.64) | 0.47 (0.17,1.34) | 0.60(0.21, 1.76)  | 0.214   | 0.584 |

**Note.** <sup>‡</sup> odds ratio was adjusted for covariates including age, gender, marital status, education level, income, smoking status, passive smoking status, alcohol drinking status, tea drinking status, using coal to roast grains or chili, washing dry grains or chili before use, fuel type, using improved stove, calcium intake, roasted chili and grains consumption, total energy intake. <sup>†</sup> We obtained 718 urinary fluoride measurements from participants. \* P < 0.05, \*\* P < 0.01.

Table S2. Association between Quartiles of Dietary Energy-adjusted Methionine and Fluorosis According to Sex, Alcohol Drinking Status, Smoking Status and Urinary Fluoride Levels

| Methionine (mg/day)      | Quartile of intake |                  |                  |                  | <i>P</i> -trend | <i>P</i> -interaction |
|--------------------------|--------------------|------------------|------------------|------------------|-----------------|-----------------------|
|                          | Q1                 | Q2               | Q3               | Q4               |                 |                       |
| <b>Sex</b>               |                    |                  |                  |                  |                 |                       |
| <b>Men</b>               |                    |                  |                  |                  |                 |                       |
| No. cases/controls       | 66/13              | 80/16            | 81/25            | 84/47            |                 |                       |
| OR (95% CI) <sup>‡</sup> | 1                  | 1.18 (0.50,2.77) | 0.67 (0.29,1.54) | 0.37 (0.17,0.81) | 0.001           |                       |
| <b>Women</b>             |                    |                  |                  |                  |                 |                       |
| No. cases/controls       | 105/39             | 100/28           | 83/35            | 54/38            |                 |                       |
| OR (95% CI) <sup>‡</sup> | 1                  | 1.09 (0.58,2.02) | 0.75 (0.41,1.38) | 0.51(0.27, 0.96) | 0.024           | 0.603                 |
| <b>Alcohol</b>           |                    |                  |                  |                  |                 |                       |
| <b>Drinker</b>           |                    |                  |                  |                  |                 |                       |
| No. cases/controls       | 43/11              | 56/15            | 53/14            | 50/33            |                 |                       |
| OR (95% CI) <sup>‡</sup> | 1                  | 1.11 (0.41,0.30) | 1.24 (0.44,3.50) | 0.44 (0.17,1.15) | 0.040           |                       |
| <b>Non-drinker</b>       |                    |                  |                  |                  |                 |                       |
| No. cases/controls       | 128/41             | 124/29           | 111/46           | 88/52            |                 |                       |
| OR (95% CI) <sup>‡</sup> | 1                  | 1.16 (0.65,2.06) | 0.64 (0.37,1.10) | 0.47 (0.27,0.83) | 0.002           | 0.893                 |
| <b>Smoking status</b>    |                    |                  |                  |                  |                 |                       |
| <b>Smoker</b>            |                    |                  |                  |                  |                 |                       |
| No. cases/controls       | 64/16              | 73/14            | 72/19            | 68/36            |                 |                       |
| OR (95% CI) <sup>‡</sup> | 1                  | 1.49 (0.64,3.51) | 1.00 (0.43,2.36) | 0.49 (0.22,1.07) | 0.016           |                       |
| <b>Non-smoker</b>        |                    |                  |                  |                  |                 |                       |
| No. cases/controls       | 107/36             | 107/30           | 92/41            | 70/49            |                 |                       |

|                            |       |                  |                  |                    |         |       |
|----------------------------|-------|------------------|------------------|--------------------|---------|-------|
| OR (95% CI) <sup>‡</sup>   | 1     | 1.04(0.57,1.91)  | 0.64 (0.36,1.16) | 0.47 (0.25,0.85)   | 0.005   | 0.734 |
| Urinary level <sup>†</sup> |       |                  |                  |                    |         |       |
| ≤1.6 mg/L                  |       |                  |                  |                    |         |       |
| No. cases/controls         | 74/25 | 91/20            | 82/29            | 77/57              |         |       |
| OR (95% CI) <sup>‡</sup>   | 1     | 1.45 (0.67,3.06) | 0.81 (0.40,1.65) | 0.31 (0.16,0.62)** | < 0.001 |       |
| >1.6mg/L                   |       |                  |                  |                    |         |       |
| No. cases/controls         | 58/15 | 62/8             | 56/15            | 40/9               |         |       |
|                            | 1     | 1.87 (0.68,5.14) | 1.01 (0.41,2.51) | 1.28 (0.43, 3.75)  | 0.888   | 0.147 |

**Note.** <sup>‡</sup> See table S1 for the covariates. <sup>†</sup> We obtained 718 urinary fluoride measurements from participants. \* P < 0.05, \*\* P < 0.01.

Table S3. Association between Quartiles of Dietary Energy-adjusted Vitamin B<sub>6</sub> and Fluorosis According to Sex, Alcohol Drinking Status, Smoking Status and Urinary Fluoride Levels

| Vitamin B <sub>6</sub> (mg/day) | Quartile of intake |                  |                    |                    | <i>P</i> -trend | <i>P</i> -interaction |
|---------------------------------|--------------------|------------------|--------------------|--------------------|-----------------|-----------------------|
|                                 | Q1                 | Q2               | Q3                 | Q4                 |                 |                       |
| <b>Sex</b>                      |                    |                  |                    |                    |                 |                       |
| <b>Men</b>                      |                    |                  |                    |                    |                 |                       |
| No. cases/controls              | 71/10              | 76/17            | 86/38              | 78/36              |                 |                       |
| OR (95% CI) <sup>‡</sup>        | 1                  | 0.60 (0.25,1.47) | 0.26 (0.11,0.60)** | 0.33 (0.14,0.76)** | 0.003           |                       |
| <b>Women</b>                    |                    |                  |                    |                    |                 |                       |
| No. cases/controls              | 106/36             | 104/27           | 67/33              | 65/44              |                 |                       |
| OR (95% CI) <sup>‡</sup>        | 1                  | 1.24(0.67,2.32)  | 0.70 (0.37,1.32)   | 0.36 (0.19,0.69)** | 0.001           | 0.877                 |
| <b>Alcohol</b>                  |                    |                  |                    |                    |                 |                       |
| <b>Drinker</b>                  |                    |                  |                    |                    |                 |                       |
| No. cases/controls              | 42/7               | 64/16            | 45/24              | 51/26              |                 |                       |
| OR (95% CI) <sup>‡</sup>        | 1                  | 0.56 (0.19,1.62) | 0.27 (0.09,0.79)*  | 0.31 (0.11,0.88)*  | 0.015           |                       |
| <b>Non-drinker</b>              |                    |                  |                    |                    |                 |                       |
| No. cases/controls              | 135/39             | 116/28           | 108/47             | 92/54              |                 |                       |
| OR (95% CI) <sup>‡</sup>        | 1                  | 1.12 (0.62,2.00) | 0.53 (0.30,0.92)*  | 0.37 (0.21,0.66)** | < 0.001         | 0.862                 |
| <b>Smoking status</b>           |                    |                  |                    |                    |                 |                       |
| <b>Smoker</b>                   |                    |                  |                    |                    |                 |                       |
| No. cases/controls              | 67/12              | 74/18            | 72/29              | 64/26              |                 |                       |
| OR (95% CI) <sup>‡</sup>        | 1                  | 0.79 (0.33,1.89) | 0.34 (0.15,0.79)*  | 0.50 (0.21,1.19)   | 0.041           |                       |
| <b>Non-smoker</b>               |                    |                  |                    |                    |                 |                       |
| No. cases/controls              | 110/34             | 106/26           | 81/42              | 79/54              |                 |                       |

|                            |       |                  |                   |                    |         |       |
|----------------------------|-------|------------------|-------------------|--------------------|---------|-------|
| OR (95% CI) <sup>‡</sup>   | 1     | 1.11 (0.59,2.08) | 0.53 (0.31,1.05)  | 0.32 (0.17,0.59)** | < 0.001 | 0.655 |
| Urinary level <sup>†</sup> |       |                  |                   |                    |         |       |
| ≤1.6 mg/L                  |       |                  |                   |                    |         |       |
| No. cases/controls         | 88/26 | 85/20            | 72/34             | 79/51              |         |       |
| OR (95% CI) <sup>‡</sup>   | 1     | 1.12 (0.55,2.31) | 0.49 (0.24,0.98)* | 0.31 (0.16,0.60)** | < 0.001 |       |
| >1.6mg/L                   |       |                  |                   |                    |         |       |
| No. cases/controls         | 52/12 | 65/10            | 54/16             | 45/9               |         |       |
|                            | 1     | 1.43 (0.52,3.94) | 0.65 (0.24,1.75)  | 0.99 (0.33,3.01)   | 0.628   | 0.273 |

**Note.** <sup>‡</sup> See table S1 for the covariates. <sup>†</sup> We obtained 718 urinary fluoride measurements from participants. \* P< 0.05, \*\* P< 0.01.

Table S4. Association between Quartiles of Dietary Energy-adjusted Total Choline and Fluorosis According to Sex, Alcohol Drinking Status, Smoking Status and Urinary Fluoride Levels

| Total choline (mg/day)   | Quaritle of intake |                   |                    |                    | <i>P</i> -trend | <i>P</i> -interaction |
|--------------------------|--------------------|-------------------|--------------------|--------------------|-----------------|-----------------------|
|                          | Q1                 | Q2                | Q3                 | Q4                 |                 |                       |
| <b>Sex</b>               |                    |                   |                    |                    |                 |                       |
| <b>Men</b>               |                    |                   |                    |                    |                 |                       |
| No. cases/controls       | 77/11              | 71/21             | 77/35              | 86/34              |                 |                       |
| OR (95% CI) <sup>‡</sup> | 1                  | 0.49 (0.21,1.13)  | 0.32 (0.14,0.71)** | 0.43 (0.19,0.97)*  | 0.044           |                       |
| <b>Women</b>             |                    |                   |                    |                    |                 |                       |
| No. cases/controls       | 103/32             | 97/35             | 83/29              | 59/44              |                 |                       |
| OR (95% CI) <sup>‡</sup> | 1                  | 0.73 (0.39,1.35)  | 0.94 (0.49,1.79)   | 0.39 (0.20,0.74)** | 0.016           | 0.662                 |
| <b>Alcohol</b>           |                    |                   |                    |                    |                 |                       |
| <b>Drinker</b>           |                    |                   |                    |                    |                 |                       |
| No. cases/controls       | 44/11              | 48/13             | 53/26              | 57/23              |                 |                       |
| OR (95% CI) <sup>‡</sup> | 1                  | 1.02 (0.38,2.76)  | 0.32 (0.25,1.46)   | 0.85 (0.34,2.12)   | 0.519           |                       |
| <b>Non-drinker</b>       |                    |                   |                    |                    |                 |                       |
| No. cases/controls       | 136/32             | 120/43            | 107/38             | 88/55              |                 |                       |
| OR (95% CI) <sup>‡</sup> | 1                  | 0.53 (0.30,0.94)* | 0.59 (0.33,1.06)   | 0.35 (0.20,0.63)** | 0.001           | 0.368                 |
| <b>Smoking status</b>    |                    |                   |                    |                    |                 |                       |
| <b>Smoker</b>            |                    |                   |                    |                    |                 |                       |
| No. cases/controls       | 66/12              | 68/22             | 73/26              | 70/25              |                 |                       |
| OR (95% CI) <sup>‡</sup> | 1                  | 0.58 (0.25,1.32)  | 0.55 (0.24,1.25)   | 0.69 (0.30,1.60)   | 0.480           |                       |
| <b>Non-smoker</b>        |                    |                   |                    |                    |                 |                       |
| No. cases/controls       | 114/31             | 100/34            | 87/38              | 75/53              |                 |                       |

|                            |       |                  |                  |                    |       |       |
|----------------------------|-------|------------------|------------------|--------------------|-------|-------|
| OR (95% CI) <sup>‡</sup>   | 1     | 0.68 (0.37,1.25) | 0.61 (0.33,1.12) | 0.35 (0.19,0.64)** | 0.001 | 0.093 |
| Urinary level <sup>†</sup> |       |                  |                  |                    |       |       |
| ≤1.6 mg/L                  |       |                  |                  |                    |       |       |
| No. cases/controls         | 76/20 | 82/34            | 89/29            | 77/48              |       |       |
| OR (95% CI) <sup>‡</sup>   | 1     | 0.53 (0.26,1.07) | 0.65 (0.31,1.35) | 0.35 (0.17,0.70)** | 0.008 |       |
| >1.6mg/L                   |       |                  |                  |                    |       |       |
| No. cases/controls         | 64/12 | 63/9             | 42/16            | 47/10              |       |       |
|                            | 1     | 1.48 (0.50,4.37) | 0.58 (0.22,1.55) | 1.20 (0.41,3.49)   | 0.749 | 0.498 |

**Note.** <sup>‡</sup> See table S1 for the covariates. <sup>†</sup> We obtained 718 urinary fluoride measurements from participants. \* P < 0.05, \*\* P < 0.01.



Table S5. Association between Quartiles of Dietary Energy-adjusted Betaine and Fluorosis According to Sex, Alcohol Drinking Status, Smoking Status and Urinary Fluoride Levels

| Betaine (mg/day)         | Quaritle of intake |                  |                  |                               | <i>P</i> -trend | <i>P</i> -interaction |
|--------------------------|--------------------|------------------|------------------|-------------------------------|-----------------|-----------------------|
|                          | Q1                 | Q2               | Q3               | Q4                            |                 |                       |
| <b>Sex</b>               |                    |                  |                  |                               |                 |                       |
| <b>Men</b>               |                    |                  |                  |                               |                 |                       |
| No. cases/controls       | 70/18              | 81/19            | 84/30            | 76/34                         |                 |                       |
| OR (95% CI) <sup>‡</sup> | 1                  | 1.27 (0.59,2.73) | 0.68 (0.33,1.41) | 0.72 (0.34,1.50) <sup>*</sup> | 0.153           |                       |
| <b>Women</b>             |                    |                  |                  |                               |                 |                       |
| No. cases/controls       | 103/32             | 93/31            | 78/32            | 68/45                         |                 |                       |
| OR (95% CI) <sup>‡</sup> | 1                  | 0.90 (0.48,1.69) | 0.78 (0.41,1.48) | 0.51 (0.27,0.95)              | 0.032           | 0.453                 |
| <b>Alcohol</b>           |                    |                  |                  |                               |                 |                       |
| <b>Drinker</b>           |                    |                  |                  |                               |                 |                       |
| No. cases/controls       | 47/12              | 48/16            | 55/15            | 52/30                         |                 |                       |
| OR (95% CI) <sup>‡</sup> | 1                  | 0.79 (0.31,2.03) | 0.82 (0.31,2.14) | 0.60 (0.25,1.43)              | 0.264           |                       |
| <b>Non-drinker</b>       |                    |                  |                  |                               |                 |                       |
| No. cases/controls       | 126/38             | 126/34           | 107/47           | 92/49                         |                 |                       |
| OR (95% CI) <sup>‡</sup> | 1                  | 1.14 (0.65,1.99) | 0.66 (0.38,1.14) | 0.59 (0.33,1.04)              | 0.020           | 0.809                 |
| <b>Smoking status</b>    |                    |                  |                  |                               |                 |                       |
| <b>Smoker</b>            |                    |                  |                  |                               |                 |                       |
| No. cases/controls       | 65/17              | 76/18            | 66/24            | 70/26                         |                 |                       |
| OR (95% CI) <sup>‡</sup> | 1                  | 1.20 (0.54,2.66) | 0.68 (0.32,1.48) | 0.91 (0.42,1.96)              | 0.476           |                       |
| <b>Non-smoker</b>        |                    |                  |                  |                               |                 |                       |
| No. cases/controls       | 108/33             | 98/32            | 96/38            | 74/53                         |                 |                       |

|                            |       |                  |                  |                                |       |       |
|----------------------------|-------|------------------|------------------|--------------------------------|-------|-------|
| OR (95% CI) <sup>‡</sup>   | 1     | 0.96 (0.52,1.77) | 0.75 (0.41,1.39) | 0.45 (0.25,0.82) <sup>**</sup> | 0.006 | 0.149 |
| Urinary level <sup>†</sup> |       |                  |                  |                                |       |       |
| ≤1.6 mg/L                  |       |                  |                  |                                |       |       |
| No. cases/controls         | 70/23 | 95/22            | 83/34            | 76/52                          |       |       |
| OR (95% CI) <sup>‡</sup>   | 1     | 1.26 (0.61,2.58) | 0.58 (0.29,1.16) | 0.47 (0.24,0.91) <sup>*</sup>  | 0.004 |       |
| >1.6mg/L                   |       |                  |                  |                                |       |       |
| No. cases/controls         | 66/12 | 61/13            | 43/14            | 46/8                           |       |       |
|                            | 1     | 0.80 (0.30,2.14) | 0.56 (0.21,1.50) | 1.06 (0.35,3.20)               | 0.766 | 0.205 |

**Note.** <sup>‡</sup> See table S1 for the covariates. <sup>†</sup> We obtained 718 urinary fluoride measurements from participants. <sup>\*</sup> P<0.05, <sup>\*\*</sup> P< 0.01.
